# Supplementary material
Source: PubMed Central journal article supplement (PMC8096490)
Supplement: NIHMS1676216-supplement-Supp_materials.pdf [file NIHMS1676216-supplement-Supp_materials.pdf]

**Table S1.** Multivariate Linear Regression Models for Emotional Exhaustion Scores by Discipline

| Characteristic                                      | APPs     |         | Nurses       |               | Physicians  |               | Pharmacists |               | Social Workers |         |
|-----------------------------------------------------|----------|---------|--------------|---------------|-------------|---------------|-------------|---------------|----------------|---------|
|                                                     | Estimate | P-value | Estimate     | P-value       | Estimate    | P-value       | Estimate    | P-value       | Estimate       | P-value |
| <b>Age (ref: 20-29)</b>                             |          |         |              |               |             |               |             |               |                |         |
| 30-39                                               | 0.61     | 0.8246  | -0.50        | 0.6965        | -           | -             | 5.39        | 0.2054        | 5.50           | 0.1670  |
| 40-49                                               | 4.72     | 0.1327  | 1.00         | 0.5145        | -3.32       | 0.1939        | 3.48        | 0.5115        | 0.10           | 0.9838  |
| 50-59                                               | 4.73     | 0.1562  | 0.52         | 0.7381        | -4.66       | 0.1888        | 2.90        | 0.6488        | 1.94           | 0.4544  |
| ≥60                                                 | 2.30     | 0.5473  | -3.06        | 0.1415        | -3.54       | 0.3883        | -           | -             | -              | -       |
| <b>Gender (ref: male)</b>                           |          |         |              |               |             |               |             |               |                |         |
| Female                                              | -1.45    | 0.5969  | 0.65         | 0.7746        | <b>2.91</b> | <b>0.0463</b> | 2.95        | 0.3375        | 1.94           | 0.6072  |
| <b>Relationship status (ref: married/partnered)</b> |          |         |              |               |             |               |             |               |                |         |
| Divorced/widowed/widower                            | -0.61    | 0.7497  | 0.45         | 0.6784        | -0.41       | 0.8811        | -           | -             | -              | -       |
| Single*                                             | 1.89     | 0.4754  | 0.27         | 0.8638        | <b>6.93</b> | <b>0.0315</b> | 5.25        | 0.1957        | 1.74           | 0.5888  |
| <b>Dependent (ref: 0)</b>                           |          |         |              |               |             |               |             |               |                |         |
| 1-2                                                 | -1.96    | 0.2229  | -0.38        | 0.7022        | 1.07        | 0.5314        | 3.08        | 0.3587        | 1.08           | 0.6885  |
| ≥3                                                  | -2.67    | 0.3070  | -1.44        | 0.3099        | 3.85        | 0.0530        | 5.56        | 0.2487        | -              | -       |
| <b>Years in HCT (ref: 0-2 years)</b>                |          |         |              |               |             |               |             |               |                |         |
| 3-5 years                                           | -0.75    | 0.7635  | 0.21         | 0.8743        | -2.86       | 0.2383        | -0.92       | 0.8137        | -4.88          | 0.1514  |
| 6-10 years                                          | -0.31    | 0.8938  | 0.11         | 0.9330        | 2.31        | 0.4498        | -1.20       | 0.7902        | 0.13           | 0.9728  |
| 11-20 years                                         | -2.78    | 0.2687  | 0.50         | 0.7429        | 0.69        | 0.8350        | 1.84        | 0.7412        | -2.85          | 0.5131  |
| 21 years and more                                   | -2.85    | 0.3621  | 0.19         | 0.9150        | 3.77        | 0.3525        | -           | -             | -              | -       |
| <b>Work setting (ref: Outpatient)</b>               |          |         |              |               |             |               |             |               |                |         |
| Inpatient                                           | -0.83    | 0.6461  | <b>-1.92</b> | <b>0.0464</b> | 0.41        | 0.9385        | <b>9.64</b> | <b>0.0299</b> | 2.81           | 0.4886  |
| Outpatient and inpatient both                       | -0.32    | 0.8517  | -0.80        | 0.5370        | 1.71        | 0.6918        | <b>8.28</b> | <b>0.0231</b> | 5.52           | 0.4117  |

Table S1 (Continued)

|                                                               |              |               |              |               |             |               |       |        |       |        |
|---------------------------------------------------------------|--------------|---------------|--------------|---------------|-------------|---------------|-------|--------|-------|--------|
| <b>Average hours worked/week (ref: ≤40)</b>                   |              |               |              |               |             |               |       |        |       |        |
| 41-50                                                         | 0.76         | 0.7296        | 0.61         | 0.5219        | -           | -             | -     | -      | -0.49 | 0.5885 |
| 51-60                                                         | 3.99         | 0.1042        | <b>3.31</b>  | <b>0.0498</b> | 1.31        | 0.5654        | -0.26 | 0.9195 | 4.58  | 0.4117 |
| ≥61                                                           | 1.26         | 0.6991        | 2.84         | 0.2692        | 4.00        | 0.0836        | -5.60 | 0.1779 | -     | -      |
| <b>Nights/month on call (ref: 0 nights)</b>                   |              |               |              |               |             |               |       |        |       |        |
| 1-5 nights                                                    | -3.88        | 0.1174        | 1.83         | 0.2087        | <b>4.89</b> | <b>0.0234</b> | -2.84 | 0.3846 | -0.49 | 0.909  |
| ≥ 6 nights                                                    | <b>-7.03</b> | <b>0.0346</b> | 0.13         | 0.9480        | <b>7.13</b> | <b>0.0015</b> | 1.29  | 0.6745 | 4.15  | 0.3942 |
| <b>Hours/week spent on patient care (ref: 0-20)</b>           |              |               |              |               |             |               |       |        |       |        |
| 21-40                                                         | 3.56         | 0.0817        | 0.59         | 0.5858        | 0.26        | 0.8767        | -0.14 | 0.9751 | -1.53 | 0.6586 |
| ≥41                                                           | <b>4.62</b>  | <b>0.0364</b> | 1.75         | 0.2365        | -0.35       | 0.8571        | -0.84 | 0.8499 | 3.62  | 0.4659 |
| <b>Hours/week on administrative (ref: ≤ 20)</b>               |              |               |              |               |             |               |       |        |       |        |
| >20                                                           | 3.78         | 0.0515        | 1.04         | 0.3332        | 2.15        | 0.2423        | 6.86  | 0.0583 | 5.33  | 0.2807 |
| <b>Hours/week working at home (ref: 0-10)</b>                 |              |               |              |               |             |               |       |        |       |        |
| >10                                                           | 2.81         | 0.1499        | -2.79        | 0.0890        | <b>4.21</b> | <b>0.0088</b> | 8.50  | 0.0732 | 4.46  | 0.5803 |
| <b>Hours/week spent on research tasks at home (ref: 0-10)</b> |              |               |              |               |             |               |       |        |       |        |
| >10                                                           | -0.62        | 0.8314        | <b>6.93</b>  | <b>0.0008</b> | -1.33       | 0.4100        | 1.65  | 0.7652 | -8.93 | 0.3267 |
| <b>Hours/week spent on certification tasks (ref: 0-10)</b>    |              |               |              |               |             |               |       |        |       |        |
| >10                                                           | -0.28        | 0.8973        | <b>-2.72</b> | <b>0.0196</b> | 1.18        | 0.5908        | -4.42 | 0.4648 | 1.95  | 0.6733 |

Table S1 (Continued)

|                                                  |       |        |               |               |       |        |               |               |       |        |
|--------------------------------------------------|-------|--------|---------------|---------------|-------|--------|---------------|---------------|-------|--------|
| <b>Patient population (ref: adult)</b>           |       |        |               |               |       |        |               |               |       |        |
| Pediatric                                        | 0.30  | 0.8876 | -0.33         | 0.7814        | -2.40 | 0.2339 | <b>-14.72</b> | <b>0.0035</b> | -2.57 | 0.5119 |
| Both                                             | -1.54 | 0.5925 | <b>-3.19</b>  | <b>0.0115</b> | 3.46  | 0.1161 | -3.34         | 0.3232        | -5.42 | 0.2854 |
| <b>Total transplant volume (ref: 0-50)</b>       |       |        |               |               |       |        |               |               |       |        |
| 51-150                                           | 2.11  | 0.3794 | 0.50          | 0.7096        | -2.54 | 0.2619 | <b>-11.10</b> | <b>0.0117</b> | -5.22 | 0.1836 |
| >150                                             | 2.90  | 0.3712 | 0.50          | 0.8023        | -2.56 | 0.4709 | -8.78         | 0.2162        | -9.58 | 0.0983 |
| Unknown                                          | 2.34  | 0.5684 | 2.18          | 0.2935        | -     | -      | -             | -             | -7.94 | 0.2194 |
| <b>Autologous transplant volume (ref: 0-50)</b>  |       |        |               |               |       |        |               |               |       |        |
| 51-150                                           | -0.51 | 0.8363 | -0.36         | 0.8246        | -1.39 | 0.5517 | -0.14         | 0.9738        | 4.72  | 0.3173 |
| >150                                             | 1.21  | 0.7211 | -3.10         | 0.1719        | 0.30  | 0.9239 | 2.65          | 0.6123        | 4.98  | 0.4153 |
| Unknown                                          | 2.61  | 0.7545 | 10.26         | 0.0655        | -     | -      | -             | -             | 9.14  | 0.1063 |
| <b>Allogeneic transplant volume (ref: 0-50 )</b> |       |        |               |               |       |        |               |               |       |        |
| 51-150                                           | -1.71 | 0.4582 | 1.63          | 0.2900        | 3.29  | 0.1299 | -1.00         | 0.7995        | 1.88  | 0.7029 |
| >150                                             | -2.37 | 0.4667 | <b>4.68</b>   | <b>0.0424</b> | 1.87  | 0.5716 | -0.04         | 0.9944        | -     | -      |
| Unknown                                          | -2.60 | 0.7533 | <b>-11.18</b> | <b>0.0445</b> | -     | -      | -             | -             | 1.69  | 0.8221 |

Note: Significant variables are bolded.

APPs indicates advanced practice providers; ref indications reference.

\*Single includes divorced/widowed/widower for Pharmacists and Social Workers due to small numbers of responses to divorced/widowed/widower

**Table S2.** Multivariate Linear Regression Models for Depersonalization by Discipline

| Characteristic                                      | APPs        |               | Nurses       |               | Physicians |         | Pharmacists |         | Social workers |               |
|-----------------------------------------------------|-------------|---------------|--------------|---------------|------------|---------|-------------|---------|----------------|---------------|
|                                                     | Estimate    | P-value       | Estimate     | P-value       | Estimate   | P-value | Estimate    | P-value | Estimate       | P-value       |
| <b>Age (ref: 20-29)</b>                             |             |               |              |               |            |         |             |         |                |               |
| 30-39                                               | 0.02        | 0.9864        | -0.98        | 0.1075        | -          | -       | 1.00        | 0.7353  | 1.04           | 0.4082        |
| 40-49                                               | -0.63       | 0.6830        | <b>-1.71</b> | <b>0.0198</b> | -1.81      | 0.1201  | 2.65        | 0.4729  | -1.37          | 0.3587        |
| 50-59                                               | 0.68        | 0.6751        | <b>-2.21</b> | <b>0.0032</b> | -2.49      | 0.1229  | 2.90        | 0.5140  | -2.43          | 0.1169        |
| ≥60                                                 | -1.24       | 0.5088        | <b>-3.41</b> | <b>0.0006</b> | -3.44      | 0.0662  | -           | -       | -              | -             |
| <b>Gender (ref: male)</b>                           |             |               |              |               |            |         |             |         |                |               |
| Female                                              | -1.89       | 0.1593        | -1.13        | 0.2956        | 0.04       | 0.0880  | 0.81        | 0.7040  | 0.71           | 0.5497        |
| <b>Relationship status (ref: married/partnered)</b> |             |               |              |               |            |         |             |         |                |               |
| Divorced/widowed/widower                            | 0.21        | 0.8694        | -0.02        | 0.9814        | 2.50       | 0.0880  | 0.93        | 0.7414  | 0.22           | 0.8311        |
| Single                                              | -0.99       | 0.2891        | 0.51         | 0.3265        | -1.09      | 0.3877  | -           | -       | -              | -             |
| <b>Dependent (ref: 0)</b>                           |             |               |              |               |            |         |             |         |                |               |
| 1-2                                                 | -1.46       | 0.0651        | 0.85         | 0.0745        | -0.31      | 0.6887  | 1.00        | 0.6687  | 0.18           | 0.8313        |
| ≥3                                                  | -2.20       | 0.0867        | 0.23         | 0.7397        | 0.14       | 0.8756  | -0.80       | 0.8118  | -              | -             |
| <b>Average hours worked/week (ref: ≤40)</b>         |             |               |              |               |            |         |             |         |                |               |
| 41-50                                               | 0.04        | 0.9714        | 0.51         | 0.2644        | -          | -       | -           | -       | 1.36           | 0.1702        |
| 51-60                                               | 1.23        | 0.3053        | 0.73         | 0.3646        | 1.21       | 0.2440  | 1.35        | 0.4545  | 2.82           | 0.1126        |
| ≥61                                                 | -0.18       | 0.9114        | 1.15         | 0.3473        | 0.70       | 0.5032  | -0.87       | 0.7608  | -              | -             |
| <b>Nights/month on call (ref: 0 nights)</b>         |             |               |              |               |            |         |             |         |                |               |
| 1-5 nights                                          | 0.48        | 0.6921        | 1.06         | 0.1261        | 0.83       | 0.3973  | -2.13       | 0.3504  | -0.92          | 0.4950        |
| ≥ 6 nights                                          | 2.34        | 0.1503        | -0.95        | 0.3312        | 1.19       | 0.2396  | 0.08        | 0.9690  | 1.52           | 0.3221        |
| <b>Hours/week spent on patient care (ref: 0-20)</b> |             |               |              |               |            |         |             |         |                |               |
| 21-40                                               | <b>2.57</b> | <b>0.0105</b> | 0.08         | 0.8702        | 0.72       | 0.3456  | 5.16        | 0.1061  | 1.35           | 0.2206        |
| ≥41                                                 | <b>2.62</b> | <b>0.0158</b> | 0.17         | 0.8054        | -1.19      | 0.1815  | 4.52        | 0.1473  | <b>3.64</b>    | <b>0.0230</b> |

Table S2 (Continued)

|                                                                        |             |               |              |               |       |        |       |        |       |        |
|------------------------------------------------------------------------|-------------|---------------|--------------|---------------|-------|--------|-------|--------|-------|--------|
| <b>Hours/week on administrative (ref: <math>\geq 20</math>)</b><br>>20 | <b>2.69</b> | <b>0.0050</b> | -0.02        | 0.9662        | 0.93  | 0.2673 | 1.53  | 0.5392 | 0.18  | 0.9053 |
| <b>Hours/week working at home (ref: 0-10)</b><br>>10                   | -0.30       | 0.7505        | -1.17        | 0.1345        | 0.93  | 0.2103 | 4.49  | 0.1721 | 0.39  | 0.8783 |
| <b>Hours/week spent on research tasks at home (ref: 0-10)</b><br>>10   | -0.92       | 0.5204        | <b>2.34</b>  | <b>0.0169</b> | -0.17 | 0.8141 | -3.61 | 0.3517 | -1.90 | 0.5081 |
| <b>Hours/week spent on certification tasks (ref: 0-10)</b><br>>10      | -0.04       | 0.9688        | -0.85        | 0.1260        | 0.90  | 0.3703 | 0.71  | 0.8654 | 0.51  | 0.7266 |
| <b>Patient population (ref: adult)</b><br>Pediatric                    | 0.65        | 0.5289        | -0.52        | 0.3520        | -1.24 | 0.1744 | -1.23 | 0.7143 | -0.87 | 0.4823 |
| Both                                                                   | -0.54       | 0.7037        | -0.76        | 0.2084        | 0.85  | 0.3962 | -1.91 | 0.4170 | -1.14 | 0.4767 |
| <b>Total transplant volume (ref: 0-50)</b><br>51-150                   | 1.74        | 0.1398        | 0.71         | 0.2727        | 0.14  | 0.8934 | 0.84  | 0.7770 | -1.38 | 0.2662 |
| >150                                                                   | 2.25        | 0.1574        | 0.62         | 0.5097        | -0.54 | 0.7389 | 4.57  | 0.3540 | -2.61 | 0.1525 |
| Unknown                                                                | -0.28       | 0.8893        | -0.06        | 0.9481        | -     | -      | -     | -      | -1.40 | 0.4911 |
| <b>Autologous transplant volume (ref: 0-50)</b><br>51-150              | 1.00        | 0.4057        | -1.18        | 0.1270        | -0.59 | 0.5792 | -1.13 | 0.7111 | 1.08  | 0.4692 |
| >150                                                                   | 1.02        | 0.5372        | <b>-2.69</b> | <b>0.0130</b> | 0.99  | 0.4937 | -3.14 | 0.3908 | 1.16  | 0.5487 |
| Unknown                                                                | 0.24        | 0.9528        | 0.85         | 0.7472        | -     | -      | -     | -      | 2.27  | 0.2019 |
| <b>Allogeneic transplant volume (ref: 0-50)</b><br>51-150              | -0.92       | 0.4144        | <b>1.68</b>  | <b>0.0228</b> | 1.33  | 0.1774 | 1.45  | 0.5977 | 1.29  | 0.4075 |
| >150                                                                   | -0.24       | 0.8826        | <b>3.34</b>  | <b>0.0024</b> | -1.46 | 0.3309 | 4.52  | 0.2472 | -     | -      |
| Unknown                                                                | -0.21       | 0.9587        | -0.91        | 0.7314        | -     | -      | -     | -      | 3.27  | 0.1553 |

APPs indicates advanced practice providers.

**Table S3.** Univariate Logistic Regression on Burnout by Discipline: Pharmacists and Social Workers

| Characteristic                                      | Pharmacists |             |         | Social Workers |              |         |
|-----------------------------------------------------|-------------|-------------|---------|----------------|--------------|---------|
|                                                     | OR          | 95% CI      | P-value | OR             | 95% CI       | P-value |
| <b>Age (ref: 20-39*)</b>                            |             |             |         |                |              |         |
| 40-49                                               | 0.68        | (0.23-1.95) | 0.4680  | 0.68           | (0.18-2.52)  | 0.5588  |
| 50-59                                               | 0.98        | (0.30-3.28) | 0.9796  | 0.59           | (0.19-1.81)  | 0.3524  |
| <b>Gender (ref: male)</b>                           |             |             |         |                |              |         |
| Female                                              | 0.80        | (0.32-1.98) | 0.6300  |                |              |         |
| <b>Relationship status (ref: married/partnered)</b> |             |             |         |                |              |         |
| Single (including divorced/widowed/widower)         | 1.15        | 0.45-2.93   | 0.7764  | 3.83           | (0.45-32.46) | 0.2180  |
| <b>Dependent (ref: 0)</b>                           |             |             |         |                |              |         |
| ≥1                                                  | 1.19        | (0.52-2.76) | 0.6799  | 1.14           | (0.44-2.98)  | 0.7899  |
| <b>Years in HCT (ref: 0-5 years)</b>                |             |             |         |                |              |         |
| 6-10 years                                          | 1.73        | (0.62-4.86) | 0.2987  | 2.19           | (0.66-7.31)  | 0.2012  |
| ≥11 years                                           | 1.65        | (0.62-4.41) | 0.3205  | 1.06           | (0.33-3.38)  | 0.9258  |
| <b>Work setting (ref: Outpatient)</b>               |             |             |         |                |              |         |
| Inpatient                                           | 0.91        | (0.25-3.30) | 0.8868  | 2.92           | (0.66-12.99) | 0.8040  |
| Outpatient and inpatient both                       | 0.94        | (0.27-3.25) | 0.9206  | 1.57           | (0.51-4.80)  | 0.8223  |
| <b>Average hours worked/week(ref: ≤40)*</b>         |             |             |         |                |              |         |
| 41-50                                               |             |             |         | 2.00           | (0.61-6.57)  | 0.2531  |
| 51-60                                               | 1.54        | (0.62-3.86) | 0.3537  | -              | -            | -       |
| ≥61                                                 | 2.16        | (0.62-7.49) | 0.2250  | -              | -            | -       |
| <b>Nights/month on call (ref: 0 nights)</b>         |             |             |         |                |              |         |
| 1-5 nights                                          | 0.68        | (0.21-2.19) | 0.5161  | 4.27           | (0.77-23.73) | 0.0973  |
| ≥ 6 nights                                          | 1.29        | (0.43-3.85) | 0.6475  |                |              |         |
| <b>Hours/week spent on patient care (ref: 0-40)</b> |             |             |         |                |              |         |
| ≥41                                                 | 1.02        | (0.48-2.14) | 0.9630  | 1.83           | (0.36-9.35)  | 0.4660  |

Table S3 (Continued)

|                                               |             |                    |               |             |                    |               |
|-----------------------------------------------|-------------|--------------------|---------------|-------------|--------------------|---------------|
| <b>Hours/week working at home (ref: 0-10)</b> |             |                    |               |             |                    |               |
| >10                                           | 2.57        | (0.74-8.94)        | 0.1380        | -           | -                  | -             |
| <b>Patient population (ref: adult)</b>        |             |                    |               |             |                    |               |
| Non-adult (Pediatric & both)                  | 0.71        | (0.29-1.77)        | 0.4634        | 0.54        | (0.16-1.86)        | 0.3342        |
| <b>Total transplant volume (ref: 0-50)</b>    |             |                    |               |             |                    |               |
| 51-150                                        | 0.77        | (0.21-2.89)        | 0.7074        | 0.67        | (0.17-2.56)        | 0.5552        |
| >150                                          | 1.88        | (0.55-6.49)        | 0.3181        | 0.92        | (0.28-3.05)        | 0.8956        |
| <b>Moral Distress Scale Score</b>             | <b>1.02</b> | <b>(1.00-1.03)</b> | <b>0.0142</b> | <b>1.03</b> | <b>(1.01-1.05)</b> | <b>0.0128</b> |

Note: Significant variables are bolded; \*Pharmacists:  $\leq 50$  vs 51-60,  $\geq 61$ ; Social Workers:  $\leq 40$  vs.  $\geq 41$

OR indicates odds ratio; CI, confidence interval; ref, reference.
